# Supplementary material for: Inhibition of non-small cell lung cancer (NSCLC) growth by a novel small molecular inhibitor of EGFR
Source: PubMed Central journal article supplement (PMC4466647; doi:10.18632/oncotarget.3155), 2015-02-05
Supplement: oncotarget-06-6749-s001.pdf [file oncotarget-06-6749-s001.pdf]

## SUPPLEMENTARY FIGURE

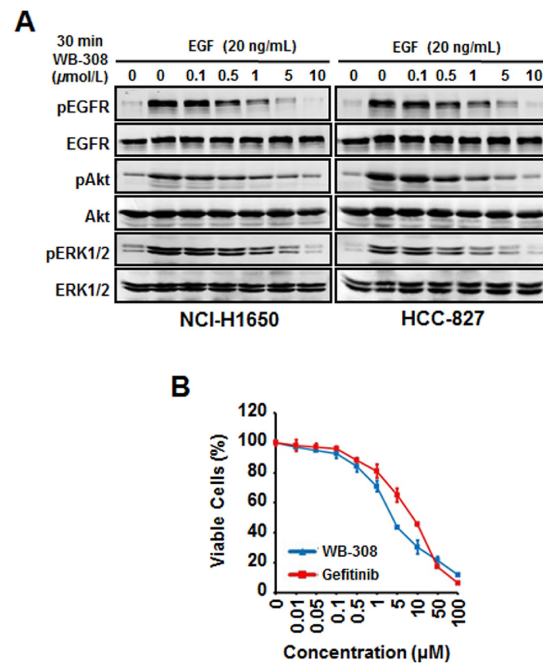

**Supplementary Figure 1:** (A) WB-308 suppresses the EGFR signaling pathway in NSCLC cells NCI-H1650 and HCC-827. (B) WB-308 suppresses the patient-derived spinal metastasized tumor cell proliferation. The patient-derived spinal metastasized tumor cells were separated and subjected to the cell viability assay stained by SRB as described in Materials and Methods. Columns, mean ( $n = 10$ ); bars, SE ( $n = 3$ ;  $t$ -test,  $P < 0.05$ ).
